# Supplementary material
Source: publisher figshare collection journal article supplement (https://sage.figshare.com/ndownloader/files/35869955)
Supplement: Supplementary file 1 [file 35869955]

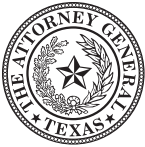

DATE OAG RECEIVED \_\_\_\_\_

# PEACE OFFICER INVOLVED INJURIES OR DEATH REPORT

As required by Art. 2.139 of the Texas Code of Criminal Procedure, law enforcement agencies shall report all officer-involved injuries or deaths caused by the discharge of a firearm. Pursuant to the requirements of Art. 2.139, the following reporting form has been created for reporting such incidents.

*"Officer-involved injury or death" means an incident during which a peace officer discharges a firearm causing injury or death to another." Art. 2.139 Code of Criminal Procedure.*

**Email completed form to:** [officershootingreport@texasattorneygeneral.gov](mailto:officershootingreport@texasattorneygeneral.gov)

DATE OF REPORT \_\_\_\_\_

## AGENCY/FACILITY INFORMATION

Name of Agency/Facility \_\_\_\_\_

Address \_\_\_\_\_

City \_\_\_\_\_ Zip Code \_\_\_\_\_

Telephone Number \_\_\_\_\_

Signature of Director of Agency/Facility (Required) \_\_\_\_\_

Name of Person Filling Out Form \_\_\_\_\_

Email of Person Filling Out Form \_\_\_\_\_

### 1. WHAT WAS THE INJURED OR DECEASED'S GENDER?

☐ Male ☐ Female

### 2. WHAT WAS THE INJURED OR DECEASED'S AGE AT TIME OF INCIDENT?

☐ Not Available

### 3. WHAT WAS THE INJURED OR DECEASED'S RACE/ETHNICITY?

(Mark one based on information reported on state driver license application, state identification card application, or other government reported identification if available and known. If not available, mark not available.)

☐ American Indian ☐ Black or African American  
or Alaska Native ☐ Hispanic or Latino  
☐ Anglo or White ☐ Other  
☐ Asian or Pacific Islander ☐ Not Available

### 4. DATE OF INCIDENT

Month \_\_\_\_\_ Day \_\_\_\_\_ Year \_\_\_\_\_

TIME: Hour \_\_\_\_\_ Min \_\_\_\_\_ ☐ AM ☐ PM

### 5. LOCATION OF INCIDENT

Street address \_\_\_\_\_

City \_\_\_\_\_

County \_\_\_\_\_ Zip \_\_\_\_\_

6. INCIDENT RESULTED IN: ☐ Injury ☐ Death

### 7. INJURED OR DECEASED PERSON:

☐ Carried, exhibited or used a deadly weapon  
☐ Did not carry, exhibit or use a deadly weapon

### 8. WHAT WAS THE PEACE OFFICER'S GENDER?

☐ Male ☐ Female

### 9. WHAT WAS THE PEACE OFFICER'S AGE AT THE TIME OF THE INCIDENT?

### 10. WHAT WAS THE PEACE OFFICER'S RACE/ETHNICITY?

(Mark only one)

☐ American Indian ☐ Black or African American  
or Alaska Native ☐ Hispanic or Latino  
☐ Anglo or White ☐ Other  
☐ Asian or Pacific Islander

### 11. DURING THE INCIDENT, PEACE OFFICER WAS:

☐ On Duty ☐ Off Duty

### 12. PEACE OFFICER WAS RESPONDING TO CALL OR REQUEST WITH ONE OR MORE OFFICERS:

☐ Yes ☐ No

### 13. INCIDENT OCCURRED DURING OR AS A RESULT OF A:

☐ Emergency Call or Request for Assistance  
☐ Traffic stop  
☐ Execution of a warrant  
☐ Hostage, barricade, or other emergency situation  
☐ Other – Specify type of call \_\_\_\_\_
